# Supplementary material for: 2,5-Dianilinoterephthalate bridged MM quadruply bonded complexes of molybdenum and tungsten
Source: Royal Society of Chemistry journal article supplement (doi:10.1039/b607709a), 2006-08-25

**Supporting Information for**

**2,5-Dianilinoterephthalate Bridged MM Quadruply Bonded  
Complexes of Molybdenum and Tungsten.**

Malcolm H. Chisholm\* and Nathan J. Patmore

Department of Chemistry, The Ohio State University  
100 W. 18<sup>th</sup> Avenue, Columbus, OH 43210-1185 USA

**Table S1.** Atomic coordinates for the geometry optimized structure of  $[(\text{HCO}_2)_3\text{Mo}_2]_2\{\mu\text{-}1,4\text{-}(\text{CO}_2)_2\text{-}2,5\text{-}(\text{NHPh})_2\text{-C}_6\text{H}_2\}$  (**1'**) in  $C_i$  symmetry.

| Atom Number | Element | Coordinates / Å |           |           |
|-------------|---------|-----------------|-----------|-----------|
|             |         | x               | y         | z         |
| 1           | C       | -1.107931       | 0.815512  | -0.088760 |
| 2           | C       | 1.107931        | -0.815512 | 0.088760  |
| 3           | C       | 1.328459        | 0.566028  | 0.051571  |
| 4           | C       | -1.328459       | -0.566028 | -0.051571 |
| 5           | C       | -0.166706       | -1.396209 | 0.031102  |
| 6           | C       | 0.166706        | 1.396209  | -0.031102 |
| 7           | C       | 0.214955        | 2.869481  | -0.042991 |
| 8           | C       | -0.214955       | -2.869481 | 0.042991  |
| 9           | O       | 1.343834        | 3.502741  | -0.020008 |
| 10          | O       | -1.343834       | -3.502741 | 0.020008  |
| 11          | O       | -0.882845       | 3.536447  | -0.068065 |
| 12          | O       | 0.882845        | -3.536447 | 0.068065  |
| 13          | Mo      | -1.311581       | -5.614155 | 0.041189  |
| 14          | Mo      | 1.311581        | 5.614155  | -0.041189 |
| 15          | Mo      | 0.805739        | -5.630105 | 0.065782  |
| 16          | Mo      | -0.805739       | 5.630105  | -0.065782 |
| 17          | O       | -0.888434       | 5.634523  | 2.056246  |
| 18          | O       | -0.844996       | 5.632568  | -2.185315 |
| 19          | O       | 0.888434        | -5.634523 | -2.056246 |
| 20          | O       | 0.844996        | -5.632568 | 2.185315  |
| 21          | O       | 1.397467        | 5.607572  | -2.159738 |
| 22          | O       | 1.354652        | 5.618361  | 2.080003  |
| 23          | O       | -1.397467       | -5.607572 | 2.159738  |
| 24          | O       | -1.354652       | -5.618361 | -2.080003 |
| 25          | O       | 1.389547        | 7.734440  | -0.045009 |
| 26          | O       | -1.389547       | -7.734440 | 0.045009  |
| 27          | O       | -0.853479       | 7.753202  | -0.066632 |
| 28          | O       | 0.853479        | -7.753202 | 0.066632  |
| 29          | H       | 1.949386        | -1.485811 | 0.187781  |
| 30          | H       | -1.949386       | 1.485811  | -0.187781 |
| 31          | C       | 0.226200        | 5.626610  | 2.669174  |
| 32          | C       | 0.282912        | 5.617444  | -2.774035 |
| 33          | C       | -0.226200       | -5.626610 | -2.669174 |
| 34          | C       | -0.282912       | -5.617444 | 2.774035  |
| 35          | C       | 0.272877        | 8.345157  | -0.056084 |
| 36          | C       | -0.272877       | -8.345157 | 0.056084  |
| 37          | H       | 0.295566        | 5.613471  | -3.868219 |
| 38          | H       | 0.214755        | 5.627801  | 3.763516  |
| 39          | H       | -0.295566       | -5.613471 | 3.868219  |
| 40          | H       | -0.214755       | -5.627801 | -3.763516 |
| 41          | H       | 0.282564        | 9.439446  | -0.056432 |
| 42          | H       | -0.282564       | -9.439446 | 0.056432  |
| 43          | N       | 2.599525        | 1.109636  | 0.136411  |
| 44          | N       | -2.599525       | -1.109636 | -0.136411 |
| 45          | H       | -2.617747       | -2.110850 | -0.281865 |
| 46          | H       | 2.617747        | 2.110850  | 0.281865  |
| 47          | C       | 3.848099        | 0.468821  | 0.046643  |

|    |   |           |           |           |
|----|---|-----------|-----------|-----------|
| 48 | C | 4.903819  | 0.969011  | 0.829358  |
| 49 | C | 4.105007  | -0.597020 | -0.832963 |
| 50 | C | 6.177715  | 0.412329  | 0.742011  |
| 51 | H | 4.710025  | 1.788677  | 1.517423  |
| 52 | C | 5.379539  | -1.160372 | -0.897799 |
| 53 | H | 3.319362  | -0.964654 | -1.483997 |
| 54 | C | 6.422817  | -0.664442 | -0.113359 |
| 55 | H | 6.978363  | 0.814681  | 1.357114  |
| 56 | H | 5.558415  | -1.984008 | -1.584196 |
| 57 | H | 7.413103  | -1.106579 | -0.171646 |
| 58 | C | -3.848099 | -0.468821 | -0.046643 |
| 59 | C | -4.903819 | -0.969011 | -0.829358 |
| 60 | C | -4.105007 | 0.597020  | 0.832963  |
| 61 | C | -6.177715 | -0.412329 | -0.742011 |
| 62 | H | -4.710025 | -1.788677 | -1.517423 |
| 63 | C | -5.379539 | 1.160372  | 0.897799  |
| 64 | H | -3.319362 | 0.964654  | 1.483997  |
| 65 | C | -6.422817 | 0.664442  | 0.113359  |
| 66 | H | -6.978363 | -0.814681 | -1.357114 |
| 67 | H | -5.558415 | 1.984008  | 1.584196  |
| 68 | H | -7.413103 | 1.106579  | 0.171646  |
| 69 | C | -1.107931 | 0.815512  | -0.088760 |
| 70 | C | 1.107931  | -0.815512 | 0.088760  |

**Table S2.** Atomic coordinates for the geometry optimized structure of  $[(\text{HCO}_2)_3\text{W}_2]_2\{\mu\text{-}1,4\text{-}(\text{CO}_2)_2\text{-}2,5\text{-}(\text{NHPh})_2\text{-C}_6\text{H}_2\}$  (**2'**) in  $C_i$  symmetry.

| Atom Number | Element | Coordinates / Å |           |           |
|-------------|---------|-----------------|-----------|-----------|
|             |         | x               | y         | z         |
| 1           | C       | -1.165213       | 0.738564  | 0.064197  |
| 2           | C       | 1.165213        | -0.738564 | 0.064197  |
| 3           | C       | 1.283425        | 0.654015  | 0.017367  |
| 4           | C       | -1.283425       | -0.654015 | 0.017367  |
| 5           | C       | -0.066396       | -1.409855 | 0.052386  |
| 6           | C       | 0.066396        | 1.409855  | 0.052386  |
| 7           | C       | 0.023640        | 2.876327  | 0.095857  |
| 8           | C       | -0.023640       | -2.876327 | 0.095857  |
| 9           | O       | 1.121859        | 3.572025  | 0.130626  |
| 10          | O       | -1.121859       | -3.572025 | 0.130626  |
| 11          | O       | -1.111542       | 3.491949  | 0.096537  |
| 12          | O       | 1.111542        | -3.491949 | 0.096537  |
| 13          | W       | -1.033997       | -5.661959 | 0.138895  |
| 14          | W       | 1.033997        | 5.661959  | 0.138895  |
| 15          | W       | 1.165213        | -5.578011 | 0.122422  |
| 16          | W       | -1.165213       | 5.578011  | 0.122422  |
| 17          | O       | -1.203005       | 5.570719  | 2.233360  |
| 18          | O       | -1.176944       | 5.596232  | -1.988194 |
| 19          | O       | 1.176944        | -5.596232 | -1.988194 |
| 20          | O       | 1.203005        | -5.570719 | 2.233360  |
| 21          | O       | 1.071784        | 5.674221  | -1.972445 |
| 22          | O       | 1.045623        | 5.652265  | 2.249440  |
| 23          | O       | -1.045623       | -5.652265 | 2.249440  |
| 24          | O       | -1.071784       | -5.674221 | -1.972445 |
| 25          | O       | 0.988400        | 7.770898  | 0.147785  |
| 26          | O       | -0.988400       | -7.770898 | 0.147785  |
| 27          | O       | -1.260823       | 7.692843  | 0.132563  |
| 28          | O       | 1.260823        | -7.692843 | 0.132563  |
| 29          | H       | 2.060177        | -1.342327 | 0.125129  |
| 30          | H       | -2.060177       | 1.342327  | 0.125129  |
| 31          | H       | 2.491793        | 2.266683  | 0.205052  |
| 32          | H       | -2.491793       | -2.266683 | 0.205052  |
| 33          | C       | -0.083480       | 5.607796  | 2.845948  |
| 34          | C       | -0.048487       | 5.638487  | -2.584694 |
| 35          | C       | 0.048487        | -5.638487 | -2.584694 |
| 36          | C       | 0.083480        | -5.607796 | 2.845948  |
| 37          | C       | -0.157926       | 8.335884  | 0.142921  |
| 38          | C       | 0.157926        | -8.335884 | 0.142921  |
| 39          | H       | -0.041127       | 5.645439  | -3.676995 |
| 40          | H       | -0.091233       | 5.601871  | 3.938214  |
| 41          | H       | 0.091233        | -5.601871 | 3.938214  |
| 42          | H       | 0.041127        | -5.645439 | -3.676995 |
| 43          | H       | -0.195771       | 9.427603  | 0.147909  |
| 44          | H       | 0.195771        | -9.427603 | 0.147909  |
| 45          | C       | -3.771594       | -0.764757 | -0.381445 |
| 46          | C       | -3.936606       | 0.261971  | -1.327666 |
| 47          | C       | -4.918592       | -1.368074 | 0.166839  |

|    |   |           |           |           |
|----|---|-----------|-----------|-----------|
| 48 | C | -5.217019 | 0.678572  | -1.692383 |
| 49 | H | -3.069739 | 0.711380  | -1.799263 |
| 50 | C | -6.191475 | -0.955614 | -0.218033 |
| 51 | H | -4.798979 | -2.156226 | 0.906973  |
| 52 | C | -6.351907 | 0.078140  | -1.143989 |
| 53 | H | -5.322933 | 1.471517  | -2.428347 |
| 54 | H | -7.061943 | -1.438931 | 0.217929  |
| 55 | H | -7.344875 | 0.406542  | -1.436514 |
| 56 | C | 3.771594  | 0.764757  | -0.381445 |
| 57 | C | 3.936606  | -0.261971 | -1.327666 |
| 58 | C | 4.918592  | 1.368074  | 0.166839  |
| 59 | C | 5.217019  | -0.678572 | -1.692383 |
| 60 | H | 3.069739  | -0.711380 | -1.799263 |
| 61 | C | 6.191475  | 0.955614  | -0.218033 |
| 62 | H | 4.798979  | 2.156226  | 0.906973  |
| 63 | C | 6.351907  | -0.078140 | -1.143989 |
| 64 | H | 5.322933  | -1.471517 | -2.428347 |
| 65 | H | 7.061943  | 1.438931  | 0.217929  |
| 66 | H | 7.344875  | -0.406542 | -1.436514 |
| 67 | N | 2.521506  | 1.276590  | 0.000177  |
| 68 | N | -2.521506 | -1.276590 | 0.000177  |
| 69 | C | -1.165213 | 0.738564  | 0.064197  |
| 70 | C | 1.165213  | -0.738564 | 0.064197  |

**Figure S1.** Diagram of the calculated structures for  $[(\text{HCO}_2)_3\text{Mo}_2]_2\{\mu\text{-}1,4\text{-}(\text{CO}_2)_2\text{-}2,5\text{-}(\text{NPh})_2\text{-C}_6\text{H}_2\}$  (**1'**) in  $C_i$  symmetry. The structure of the tungsten analogue (**2'**) is qualitatively similar.

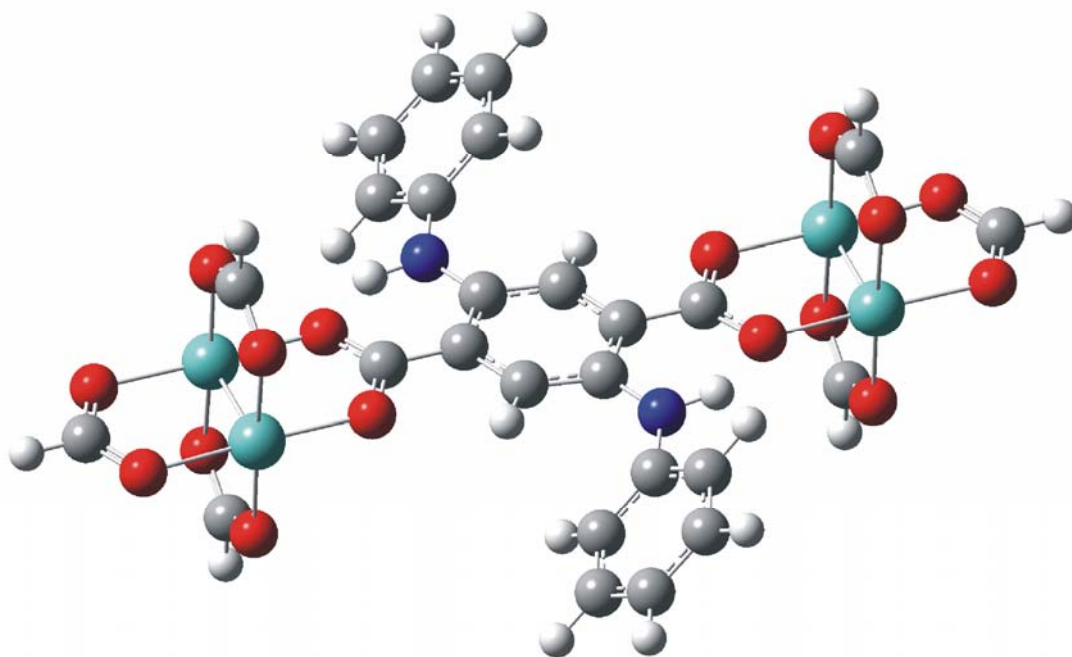

Supplement: b607709a.pdf [file b607709a.pdf]
